# Supplementary material
Source: PubMed Central journal article supplement (PMC5502624)
Supplement: pnas.1702983114.sapp.pdf [file pnas.1702983114.sapp.pdf]

**Table S1. Keio mutants defective in stimulating larval growth and molting.**

| defective subclass | JW#    | gene name | gene description                                                             | functional category                  | recovered from water? <sup>a</sup> | recovered from larvae? <sup>b</sup> | conditional on inoculum density? <sup>c</sup> |
|--------------------|--------|-----------|------------------------------------------------------------------------------|--------------------------------------|------------------------------------|-------------------------------------|-----------------------------------------------|
| growth             | JW0794 | glnQ      | L-glutamine ABC transporter, ATP binding subunit                             | amino acid biosynthesis/transport    | N                                  | N                                   | Y                                             |
| growth             | JW3706 | pstS      | phosphate ABC transporter, periplasmic binding protein                       | cofactor synthesis/transport         | N                                  | N                                   | Y                                             |
| growth             | JW3730 | rbsB      | ribose ABC transporter, putative periplasmic binding protein                 | cofactor synthesis/transport         | N                                  | N                                   | Y                                             |
| growth             | JW0450 | ybaJ      | protein that modulates Hha toxicity                                          | stress response                      | N                                  | N                                   | Y                                             |
| growth             | JW1152 | ymgA      | protein involved in biofilm formation                                        | stress response                      | N                                  | N                                   | NT                                            |
| growth             | JW0656 | ybeY      | endonuclease                                                                 | stress response                      | N                                  | N                                   | Y                                             |
| growth             | JW0695 | ybfL      | predicted transposase; receptor protein                                      | stress response                      | N                                  | N                                   | Y                                             |
| growth             | JW4366 | yjtD      | predicted rRNA methyltransferase                                             | stress response                      | N                                  | N                                   | Y                                             |
| growth             | JW3822 | fadB      | fatty acid oxidation complex, $\alpha$ component                             | fatty acid metabolism                | N                                  | N                                   | Y                                             |
| growth             | JW2880 | serA      | 2-oxoglutarate reductase                                                     | amino acid biosynthesis/transport    | N                                  | N                                   | Y                                             |
| growth             | JW0890 | serC      | 3-phosphoserine aminotransferase                                             | amino acid biosynthesis/transport    | N                                  | N                                   | NT                                            |
| growth             | JW0854 | ltaE      | L-threonine aldolase                                                         | amino acid biosynthesis/transport    | N                                  | N                                   | Y                                             |
| growth             | JW3975 | aceA      | isocitrate lyase                                                             | central metabolism                   | N                                  | N                                   | NT                                            |
| growth             | JW1839 | eda       | multifunctional aldolase/decarboxylase                                       | central metabolism                   | N                                  | N                                   | Y                                             |
| growth             | JW1838 | purT      | phosphoribosylglycinamide formyltransferase 2                                | central metabolism                   | N                                  | N                                   | Y                                             |
| growth             | JW2471 | hyfF      | hydrogenase 4, component F                                                   | central metabolism                   | N                                  | N                                   | NT                                            |
| growth             | JW2128 | dusC      | tRNA-dihydrouridine synthase C                                               | central metabolism                   | N                                  | N                                   | Y                                             |
| growth             | JW2466 | hyfA      | hydrogenase 4, component A                                                   | central metabolism                   | N                                  | N                                   | NT                                            |
| growth             | JW1375 | ldhA      | D-lactate dehydrogenase                                                      | central metabolism                   | N                                  | N                                   | Y                                             |
| growth             | JW1821 | yebR      | methionine-(R)-sulfoxide reductase                                           | stress response                      | N                                  | N                                   | Y                                             |
| growth             | JW2133 | yeiT      | NADH-dependent dihydropyrimidine dehydrogenase subunit                       | central metabolism                   | N                                  | N                                   | Y                                             |
| growth             | JW2670 | ygaD      | ribonucleoside-diphosphate reductase 2, $\beta$ subunit dimer                | central metabolism                   | N                                  | N                                   | Y                                             |
| growth             | JW2970 | yghZ      | L-glyceraldehyde 3-phosphate reductase                                       | stress response                      | N                                  | N                                   | Y                                             |
| growth             | JW3349 | rpe       | ribulose-5-phosphate 3-epimerase                                             | central metabolism                   | N                                  | N                                   | Y                                             |
| growth             | JW1841 | zwf       | glucose-6-phosphate dehydrogenase                                            | central metabolism                   | N                                  | N                                   | Y                                             |
| growth             | JW1483 | ddpX      | D-Ala-D-Ala dipeptidase                                                      | peptidoglycan biosynthesis/recycling | N                                  | N                                   | Y                                             |
| growth             | JW3175 | mtgA      | biosynthetic peptidoglycan transglycosylase                                  | peptidoglycan biosynthesis/recycling | N                                  | N                                   | Y                                             |
| growth             | JW0427 | clpP      | ClpP serine protease                                                         | stress response                      | N                                  | N                                   | Y                                             |
| growth             | JW0865 | clpS      | specificity factor for ClpA-ClpP chaperone-protease complex                  | stress response                      | N                                  | N                                   | Y                                             |
| growth             | JW0885 | pflA      | pyruvate formate-lyase activating enzyme                                     | central metabolism                   | N                                  | N                                   | Y                                             |
| growth             | JW3580 | lldD      | L-lactate dehydrogenase                                                      | central metabolism                   | N                                  | N                                   | Y                                             |
| growth             | JW1666 | pykF      | pyruvate kinase I                                                            | central metabolism                   | N                                  | N                                   | Y                                             |
| growth             | JW0807 | yblW      | predicted pyruvate formate lyase                                             | central metabolism                   | N                                  | N                                   | Y                                             |
| growth             | JW2213 | atoS      | AtoS sensory histidine kinase                                                | regulatory process                   | N                                  | N                                   | Y                                             |
| growth             | JW3905 | cytR      | CytR DNA-binding transcriptional repressor                                   | regulatory process                   | N                                  | N                                   | NT                                            |
| growth             | JW4085 | dcuR      | DcuR transcriptional activator                                               | regulatory process                   | N                                  | N                                   | Y                                             |
| growth             | JW3195 | nanR      | NanR DNA-binding transcriptional dual regulator                              | regulatory process                   | N                                  | N                                   | Y                                             |
| growth             | JW0019 | nhaR      | NhaR transcriptional activator                                               | regulatory process                   | N                                  | N                                   | Y                                             |
| growth             | JW4200 | treR      | TreR DNA-binding transcriptional repressor                                   | regulatory process                   | N                                  | N                                   | Y                                             |
| growth             | JW0198 | yafC      | putative LysR family transcriptional regulator                               | regulatory process                   | N                                  | N                                   | Y                                             |
| growth             | JW0276 | yagP      | predicted transcriptional regulator LYSR-type                                | regulatory process                   | N                                  | N                                   | Y                                             |
| growth             | JW0310 | yahD      | predicted transcriptional regulator with ankyrin domain                      | regulatory process                   | N                                  | N                                   | Y                                             |
| growth             | JW3087 | tdcC      | serine / threonine:H <sup>+</sup> symporter TdcC                             | amino acid biosynthesis/transport    | N                                  | N                                   | Y                                             |
| growth             | JW3124 | yhbQ      | DNA nuclease / DNA damage response protein                                   | stress response                      | N                                  | N                                   | NT                                            |
| growth             | JW4233 | yjgW      | KpLE2 phage-like element; predicted protein                                  | stress response                      | N                                  | N                                   | NT                                            |
| growth             | JW0455 | ybaM      | small protein involved in the cell envelope stress response                  | stress response                      | N                                  | N                                   | Y                                             |
| growth             | JW5058 | yajQ      | nucleotide binding protein                                                   | stress response                      | N                                  | N                                   | Y                                             |
| growth             | JW1252 | trpA      | tryptophan synthase, $\alpha$ subunit                                        | amino acid biosynthesis/transport    | N                                  | N                                   | Y                                             |
| colonization       | JW5092 | gltI      | glutamate / aspartate ABC transporter, periplasmic binding protein           | amino acid biosynthesis/transport    | Y                                  | N                                   | Y                                             |
| colonization       | JW0649 | gltJ      | glutamate / aspartate ABC transporter, membrane subunit                      | amino acid biosynthesis/transport    | Y                                  | N                                   | Y                                             |
| colonization       | JW3419 | livF      | branched chain amino acid / phenylalanine ABC transporter, ATP binding       | amino acid biosynthesis/transport    | Y                                  | N                                   | Y                                             |
| colonization       | JW0748 | modC      | molybdate ABC transporter, ATP binding subunit                               | cofactor synthesis/transport         | Y                                  | N                                   | Y                                             |
| colonization       | JW3444 | nikD      | nickel ABC transporter, ATP binding subunit                                  | cofactor synthesis/transport         | Y                                  | N                                   | Y                                             |
| colonization       | JW4067 | phnC      | phosphonate ABC transporter, ATP binding subunit                             | cofactor synthesis/transport         | Y                                  | N                                   | Y                                             |
| colonization       | JW4066 | phnD      | phosphonate ABC transporter, periplasmic binding protein                     | cofactor synthesis/transport         | Y                                  | N                                   | Y                                             |
| colonization       | JW1112 | potA      | putrescine / spermidine ABC transporter, ATP binding subunit                 | cofactor synthesis/transport         | Y                                  | N                                   | Y                                             |
| colonization       | JW2653 | proW      | glycine betaine ABC transporter, membrane subunit                            | amino acid biosynthesis/transport    | Y                                  | N                                   | Y                                             |
| colonization       | JW3728 | rbsA      | ribose ABC transporter, putative ATP binding subunit                         | cofactor synthesis/transport         | Y                                  | N                                   | Y                                             |
| colonization       | JW0435 | ybaE      | putative transport protein, periplasmic-binding component of ABC superfamily | amino acid biosynthesis/transport    | Y                                  | N                                   | Y                                             |
| colonization       | JW2118 | yehY      | glycine betaine ABC transporter, putative membrane subunit                   | amino acid biosynthesis/transport    | Y                                  | N                                   | Y                                             |
| colonization       | JW3712 | atpA      | ATP synthase F <sub>1</sub> complex, alpha subunit                           | other                                | Y                                  | N                                   | Y                                             |
| colonization       | JW3711 | atpG      | ATP synthase F <sub>1</sub> complex, gamma subunit                           | other                                | Y                                  | N                                   | Y                                             |
| colonization       | JW0757 | bioA      | adenosylmethionine-8-amino-7-oxononanoate aminotransferase                   | cofactor synthesis/transport         | Y                                  | N                                   | Y                                             |
| colonization       | JW0758 | bioB      | biotin synthase                                                              | cofactor synthesis/transport         | Y                                  | N                                   | Y                                             |
| colonization       | JW5130 | yccU      | predicted CoA-binding protein with NAD(P)-binding Rossmann-fold domain       | central metabolism                   | Y                                  | N                                   | Y                                             |

<sup>a</sup>Y: viable colonies recovered after plating 100  $\mu$ l of water from larval cultures 48 h post-inoculation; N: no viable colonies recovered

<sup>b</sup>Y: viable colonies recovered after plating homogenates of larvae 48 h post-inoculation; N: no viable colonies recovered

<sup>c</sup>Y: supplementation of larval cultures with 10<sup>5</sup> CFU resulted in >80% of larvae molting to the second instar within 48 h; NT: not tested

| defective subclass | JW#    | gene name | gene description                                                       | functional category                  | recovered from water? <sup>a</sup> | recovered from larvae? <sup>b</sup> | conditional inoculum density? <sup>c</sup> |
|--------------------|--------|-----------|------------------------------------------------------------------------|--------------------------------------|------------------------------------|-------------------------------------|--------------------------------------------|
| colonization       | JW2284 | yiiK      | methylmalonyl-CoA mutase                                               | central metabolism                   | Y                                  | N                                   | Y                                          |
| colonization       | JW2216 | atoA      | Acetyl-CoA:acetoacetyl-CoA transferase, beta subunit                   | fatty acid metabolism                | Y                                  | N                                   | Y                                          |
| colonization       | JW2215 | atoD      | Acetyl-CoA:acetoacetyl-CoA transferase, alpha subunit                  | fatty acid metabolism                | Y                                  | N                                   | Y                                          |
| colonization       | JW2218 | atoB      | acetyl-CoA acetyltransferase                                           | fatty acid metabolism                | Y                                  | N                                   | Y                                          |
| colonization       | JW2217 | atoE      | predicted short chain fatty acid transporter                           | fatty acid metabolism                | Y                                  | N                                   | Y                                          |
| colonization       | JW5020 | fadE      | acyl-CoA dehydrogenase                                                 | fatty acid metabolism                | Y                                  | N                                   | Y                                          |
| colonization       | JW5156 | plsX      | fatty acid/phospholipid synthesis protein                              | fatty acid metabolism                | Y                                  | N                                   | Y                                          |
| colonization       | JW3841 | glnA      | glutamine synthetase                                                   | amino acid biosynthesis/transport    | Y                                  | N                                   | Y                                          |
| colonization       | JW2872 | gcvH      | glycine cleavage system H protein                                      | amino acid biosynthesis/transport    | Y                                  | N                                   | Y                                          |
| colonization       | JW2871 | gcvP      | glycine decarboxylase                                                  | amino acid biosynthesis/transport    | Y                                  | N                                   | Y                                          |
| colonization       | JW2873 | gcvT      | aminomethyltransferase                                                 | amino acid biosynthesis/transport    | Y                                  | N                                   | Y                                          |
| colonization       | JW2535 | glyA      | serine hydroxymethyltransferase                                        | amino acid biosynthesis/transport    | Y                                  | N                                   | Y                                          |
| colonization       | JW1803 | sdaA      | L-serine deaminase I                                                   | amino acid biosynthesis/transport    | Y                                  | N                                   | Y                                          |
| colonization       | JW0002 | thrB      | homoserine kinase                                                      | amino acid biosynthesis/transport    | Y                                  | N                                   | Y                                          |
| colonization       | JW4358 | ytjC      | predicted phosphatase                                                  | central metabolism                   | Y                                  | N                                   | Y                                          |
| colonization       | JW3863 | fdol      | formate dehydrogenase-O, $\gamma$ subunit                              | central metabolism                   | Y                                  | N                                   | Y                                          |
| colonization       | JW2946 | glcD      | glycolate oxidase, predicted FAD-linked subunit                        | central metabolism                   | Y                                  | N                                   | Y                                          |
| colonization       | JW5486 | glcF      | glycolate oxidase, predicted iron-sulfur subunit                       | central metabolism                   | Y                                  | N                                   | Y                                          |
| colonization       | JW1220 | purU      | formyltetrahydrofolate deformylase                                     | central metabolism                   | Y                                  | N                                   | Y                                          |
| colonization       | JW1495 | ydeP      | acid resistance protein                                                | stress response                      | Y                                  | N                                   | Y                                          |
| colonization       | JW2303 | hisP      | lysine/arginine/ornithine/histidine ABC transporter, ATP binding       | amino acid biosynthesis/transport    | Y                                  | N                                   | Y                                          |
| colonization       | JW3606 | rfaG      | lipopolysaccharide glucosyltransferase I                               | LPS biosynthesis/modification        | Y                                  | N                                   | Y                                          |
| colonization       | JW0212 | lpcA      | D-sedoheptulose 7-phosphate isomerase                                  | LPS biosynthesis/modification        | Y                                  | N                                   | Y                                          |
| colonization       | JW3985 | pgl       | phosphoglucose isomerase                                               | LPS biosynthesis/modification        | Y                                  | N                                   | Y                                          |
| colonization       | JW3595 | rfaF      | ADP-heptose:LPS heptosyltransferase II                                 | LPS biosynthesis/modification        | Y                                  | N                                   | Y                                          |
| colonization       | JW3601 | rfaJ      | UDP-glucose:(glucosyl)LPS $\alpha$ -1,2-glucosyltransferase            | LPS biosynthesis/modification        | Y                                  | N                                   | Y                                          |
| colonization       | JW3597 | rfaL      | O-antigen ligase                                                       | LPS biosynthesis/modification        | Y                                  | N                                   | Y                                          |
| colonization       | JW3979 | methH     | cobalamin-dependent methionine synthase                                | amino acid biosynthesis/transport    | Y                                  | N                                   | Y                                          |
| colonization       | JW3459 | yhiN      | predicted oxidoreductase with FAD/NAD(P)-binding domain                | central metabolism                   | Y                                  | N                                   | Y                                          |
| colonization       | JW3853 | yihU      | 3-sulfolactaldehyde reductase                                          | stress response                      | Y                                  | N                                   | Y                                          |
| colonization       | JW4346 | deoB      | phosphopentomutase                                                     | central metabolism                   | Y                                  | N                                   | Y                                          |
| colonization       | JW4344 | deoC      | deoxyribose-phosphate aldolase                                         | central metabolism                   | Y                                  | N                                   | Y                                          |
| colonization       | JW0007 | talB      | transaldolase B                                                        | central metabolism                   | Y                                  | N                                   | Y                                          |
| colonization       | JW0106 | ampD      | N-acetyl-anhydromuramyl-L-alanine amidase                              | peptidoglycan biosynthesis/recycling | Y                                  | N                                   | Y                                          |
| colonization       | JW0823 | dacC      | D-alanyl-D-alanine carboxypeptidase                                    | peptidoglycan biosynthesis/recycling | Y                                  | N                                   | Y                                          |
| colonization       | JW5329 | dacD      | DD-carboxypeptidase, penicillin-binding protein 6b                     | peptidoglycan biosynthesis/recycling | Y                                  | N                                   | Y                                          |
| colonization       | JW5646 | envC      | EnvC divisome associated factor, activator of peptidoglycan hydrolases | peptidoglycan biosynthesis/recycling | Y                                  | N                                   | Y                                          |
| colonization       | JW0210 | ivy       | periplasmic chaperone, inhibitor of vertebrate C-type lysozyme         | peptidoglycan biosynthesis/recycling | Y                                  | N                                   | Y                                          |
| colonization       | JW1181 | ldcA      | L,D-carboxypeptidase A                                                 | peptidoglycan biosynthesis/recycling | Y                                  | N                                   | Y                                          |
| colonization       | JW2325 | mepA      | murein DD-endopeptidase                                                | peptidoglycan biosynthesis/recycling | Y                                  | N                                   | Y                                          |
| colonization       | JW1093 | nagZ      | $\beta$ -N-acetylhexosaminidase                                        | peptidoglycan biosynthesis/recycling | Y                                  | N                                   | Y                                          |
| colonization       | JW0851 | ybjR      | anhydro-N-acetylmuramoyl-L-alanine amidase                             | peptidoglycan biosynthesis/recycling | Y                                  | N                                   | Y                                          |
| colonization       | JW0908 | ycbB      | L,D-transpeptidase                                                     | peptidoglycan biosynthesis/recycling | Y                                  | N                                   | Y                                          |
| colonization       | JW5304 | yebA      | murein DD-endopeptidase                                                | peptidoglycan biosynthesis/recycling | Y                                  | N                                   | Y                                          |
| colonization       | JW0111 | aceF      | pyruvate dehydrogenase, E2 subunit                                     | central metabolism                   | Y                                  | N                                   | Y                                          |
| colonization       | JW0110 | aceE      | pyruvate dehydrogenase                                                 | central metabolism                   | Y                                  | N                                   | Y                                          |
| colonization       | JW4030 | acs       | acetyl-CoA synthetase (AMP-forming)                                    | central metabolism                   | Y                                  | N                                   | Y                                          |
| colonization       | JW1412 | aldA      | aldehyde dehydrogenase A, NAD-linked                                   | central metabolism                   | Y                                  | N                                   | Y                                          |
| colonization       | JW1643 | gloA      | glyoxalase I                                                           | central metabolism                   | Y                                  | N                                   | Y                                          |
| colonization       | JW0342 | mhpF      | acetaldehyde dehydrogenase (acylating)                                 | central metabolism                   | Y                                  | N                                   | Y                                          |
| colonization       | JW2198 | mgo       | malate:quinone oxidoreductase                                          | central metabolism                   | Y                                  | N                                   | Y                                          |
| colonization       | JW3366 | pck       | phosphoenolpyruvate carboxylase (ATP)                                  | central metabolism                   | Y                                  | N                                   | Y                                          |
| colonization       | JW0886 | pta       | pyruvate formate-lyase (inactive)                                      | central metabolism                   | Y                                  | N                                   | Y                                          |
| colonization       | JW2294 | pta       | phosphate acetyltransferase / phosphate propionyltransferase           | central metabolism                   | Y                                  | N                                   | Y                                          |
| colonization       | JW0390 | phoR      | PhoR sensory histidine kinase                                          | regulatory process                   | Y                                  | N                                   | Y                                          |
| colonization       | JW0710 | gltA      | citrate synthase                                                       | central metabolism                   | Y                                  | N                                   | Y                                          |
| colonization       | JW0112 | lpd       | lipamide dehydrogenase                                                 | central metabolism                   | Y                                  | N                                   | Y                                          |
| colonization       | JW1253 | trpB      | tryptophan synthase, $\beta$ subunit dimer                             | amino acid biosynthesis/transport    | Y                                  | N                                   | Y                                          |
| colonization       | JW2317 | pdxB      | erythronate-4-phosphate dehydrogenase                                  | cofactor synthesis/transport         | Y                                  | N                                   | Y                                          |
| colonization       | JW2548 | pdxJ      | pyridoxine 5'-phosphate synthase                                       | cofactor synthesis/transport         | Y                                  | N                                   | Y                                          |
| colonization       | JW2894 | epd       | erythrose 4-phosphate dehydrogenase                                    | cofactor synthesis/transport         | Y                                  | N                                   | Y                                          |
| colonization       | JW1628 | pdxY      | pyridoxal kinase 2                                                     | cofactor synthesis/transport         | Y                                  | N                                   | Y                                          |
| rescue             | JW4364 | arcA      | ArcA transcriptional dual regulator                                    | regulatory process/respiration       | Y                                  | Y                                   | -                                          |
| rescue             | JW0723 | cydB      | cytochrome <i>bd</i> -I terminal oxidase subunit II                    | respiration                          | Y                                  | Y                                   | -                                          |
| rescue             | JW0870 | cydD      | ATP-binding/permease protein                                           | respiration                          | Y                                  | Y                                   | -                                          |
| rescue             | JW1328 | fnr       | FNR DNA-binding transcriptional dual regulator                         | regulatory process/respiration       | Y                                  | Y                                   | -                                          |

<sup>a</sup>Y: viable colonies recovered after plating 100  $\mu$ l of water from larval cultures 48 h post-inoculation; N: no viable colonies recovered

<sup>b</sup>Y: viable colonies recovered after plating homogenates of larvae 48 h post-inoculation; N: no viable colonies recovered

<sup>c</sup>Y: supplementation of larval cultures with 10<sup>6</sup> CFU resulted in >80% of larvae molting to the second instar within 48 h; NT: not tested

**Table S2.** Primers designed against the *E. coli* K12 BW25113 genome (NCBI Accession No. CP009273) and used to construct the  $\Delta cydB\text{-}\Delta cydD::kan$  and  $\Delta narZ\text{-}\Delta narG::kan$  double mutants.\*

| Name   | Sequence (5'-3')     | Target gene | Reference  |
|--------|----------------------|-------------|------------|
| k2     | CGGTGCCCTGAATGAACTGC | <i>kan</i>  | (1)        |
| kt     | CGGCCACAGTCGATGAATCC | <i>kan</i>  | (1)        |
| cydB-U | GCAGGCGATCTCATCTTCTC | <i>cydA</i> | This study |
| cydB-D | AAGAAGCGTTCCCAGAATCC | <i>cydX</i> | This study |
| cydD-U | CACCACGGAAGTGGAAAAC  | <i>trxB</i> | This study |
| cydD-D | CGCTGATGGTCTGTCGTAGA | <i>cydC</i> | This study |
| narG-U | GCTTTGCAATGCTGTCAAAA | <i>narK</i> | This study |
| narG-D | TAACGGATACGACCGACACA | <i>narH</i> | This study |
| narZ-U | TTACAACGCCTGCATCTCTG | <i>narU</i> | This study |
| narZ-D | TTTTCTGACTTGCCGCTTTT | <i>narY</i> | This study |

\*  $\Delta cydB::kan$  and  $\Delta narZ::kan$  were transformed with pCP20, which shows thermal induction of flippase (FLP) synthesis, to excise the kanamycin resistance cassette ( $Kan^R$ ) via the flanking flippase recognition target (FRT) sites while maintaining the gene deletion (56). Individual colonies were streaked on kanamycin (25  $\mu\text{g/ml}$ ), ampicillin (200  $\mu\text{g/ml}$ ), and chloramphenicol (20  $\mu\text{g/ml}$ ) LB agar plates and selected, followed by PCR using the k2 and kt primers to confirm loss of the  $Kan^R$  cassette and pCP20 (56). Resulting kanamycin-susceptible mutants were then transduced with P1 phage stocks generated from the desired Keio mutant ( $\Delta cydD::kan$  and  $\Delta narG::kan$ ) to incorporate the second mutation. Four PCR reactions were then performed to verify that the  $\Delta cydB\text{-}\Delta cydD::kan$  and  $\Delta narZ\text{-}\Delta narG::kan$  mutants had the correct structure. New junctions created between the  $Kan^R$  cassette and neighboring upstream and downstream sequences were verified using the kanamycin (kt or k2) and locus-specific (U or D) primers. A third reaction was carried out using the flanking locus-specific primers (U and D) to verify simultaneous loss of the parental (non-mutant) fragment and gain of the new mutant-specific fragment. A fourth reaction using primers k2 and kt was then used to screen for the  $Kan^R$  cassette.

**Table S3.** Primers designed against the *E. coli* K12 BW25113 genome and used to construct the mutants  $\Delta(\text{cyoA-cyoB})::\text{kan}$ ,  $\Delta(\text{napA-napD})::\text{kan}$ , and  $\Delta\text{cydB-}\Delta\text{cydD-}\Delta(\text{cyoA-cyoB})::\text{kan}$ .\*

| Name   | Sequence (5'-3')     | Target gene     | Reference  |
|--------|----------------------|-----------------|------------|
| P1     | ATTCCGGGGATCCGTCGACC | <i>kan</i> -FRT | (2)        |
| P2     | TGTAGGCTGGAGCTGCTTCG | <i>kan</i> -FRT | (2)        |
| P1-rev | GGTCGACGGATCCCCGGAAT | <i>kan</i> -FRT | (2)        |
| P2-rev | CGAAGCAGCTCCAGCCTACA | <i>kan</i> -FRT | (2)        |
| cyoA-U | GCTGGATTATCTGGCGCTAC | <i>ampG</i>     | This study |
| cyoB-D | GATGGAGCTGAACAACAGCA | <i>cyoC</i>     | This study |
| napD-U | CGCAAAGCCAGTAACGGTAT | <i>napF</i>     | This study |
| napA-D | AGCGGTAACACCTTGATTGC | <i>napG</i>     | This study |

\*  $\Delta(\text{cyoA-cyoB})::\text{kan}$  and  $\Delta(\text{napA-napD})::\text{kan}$  were generated by first performing three standard and one fusion PCR reaction to construct linear DNA fragments containing the Kan<sup>R</sup> cassette and two flanking homology regions of the target genes. First, the Kan<sup>R</sup> cassette was PCR amplified from Keio mutant genomic DNA using primers binding upstream (P1) and downstream (P2) of the flanking FRT sites. Junctions between the Kan<sup>R</sup> cassette and neighboring upstream and downstream sequences for the target genes of interest were then PCR amplified using genomic DNA from the corresponding Keio mutants ( $\Delta\text{cyoA}::\text{kan}$ ,  $\Delta\text{cyoB}::\text{kan}$ ,  $\Delta\text{napA}::\text{kan}$ , or  $\Delta\text{napD}::\text{kan}$ ) as template and primer pairs cyoA-U/P1-rev, cyoB-D/P2-rev, napA-D/P2-rev, or napD-U/P1-rev, respectively. Finally, PCR fragments from these reactions were assembled by fusion PCR using the flanking locus-specific primers sets cyoA-U/cyoB-D and napD-U/napA-D. Assembled PCR products were purified and electroporated into the parental BW25113 strain carrying plasmid pKD46 (56). Resulting mutants were selected on kanamycin (25  $\mu\text{g/ml}$ ) and ampicillin (100  $\mu\text{g/ml}$ ) LB agar plates to ensure loss of the pKD46 plasmid. New junctions created between the Kan<sup>R</sup> cassette and neighboring upstream and downstream sequences were then verified for each mutation by PCR with kanamycin (kt or k2) and locus-specific (U or D) primers. The quadruple mutant  $\Delta\text{cydB-}\Delta\text{cydD-}\Delta(\text{cyoA-cyoB})::\text{kan}$  was generated by pCP20-mediated removal of the Kan<sup>R</sup> cassette from the  $\Delta\text{cydB-}\Delta\text{cydD}::\text{kan}$  double mutant followed by transduction with the  $\Delta(\text{cyoA-cyoB})::\text{kan}$  mutation and PCR verification of the new mutant as described above.

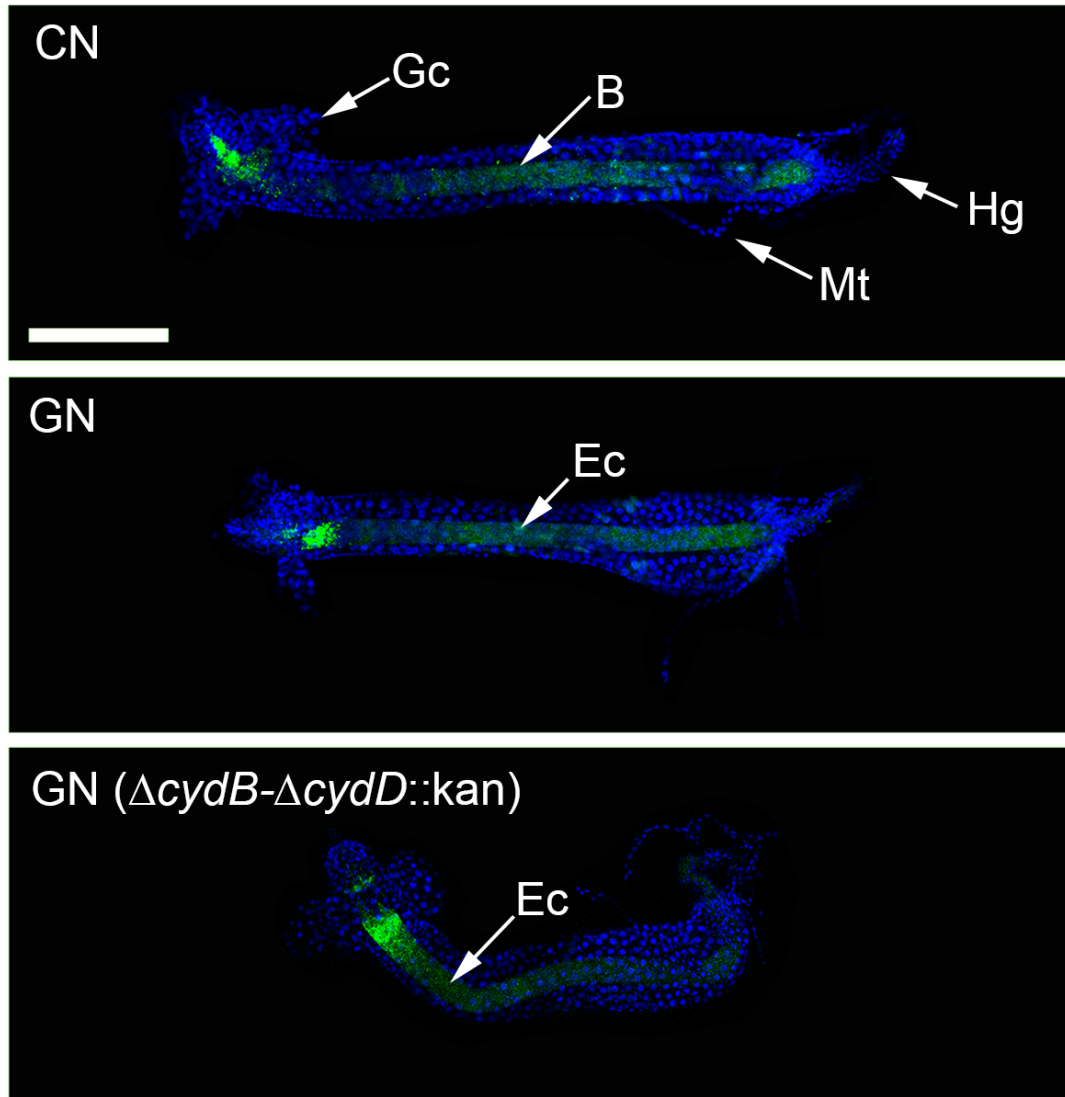

**Fig. S1.** Representative confocal microscopy images of midguts from conventional (CN) and gnotobiotic larvae inoculated with wild-type (GN) or  $\Delta cydB-\Delta cydD::kan$  *E. coli*. The foregut was removed in each image resulting in the gastric caecae (Gc), Malpighian tubules (Mt) and hindgut (Hg) being oriented left to right. Cell nuclei were stained with Hoechst 33342 (blue) while a peptidoglycan antibody (GeneTex) visualized by an Alexafluor 488 secondary antibody (green) labeled the mixed community of bacteria (B) in CN larvae and *E. coli* (Ec) in gnotobiotic larvae. Note the distribution and fluorescence intensity of bacteria is very similar across treatments. Methods for antibody labeling and confocal microscopy are as previously described (3). Scale bar in the upper panel equals 200  $\mu$ m.

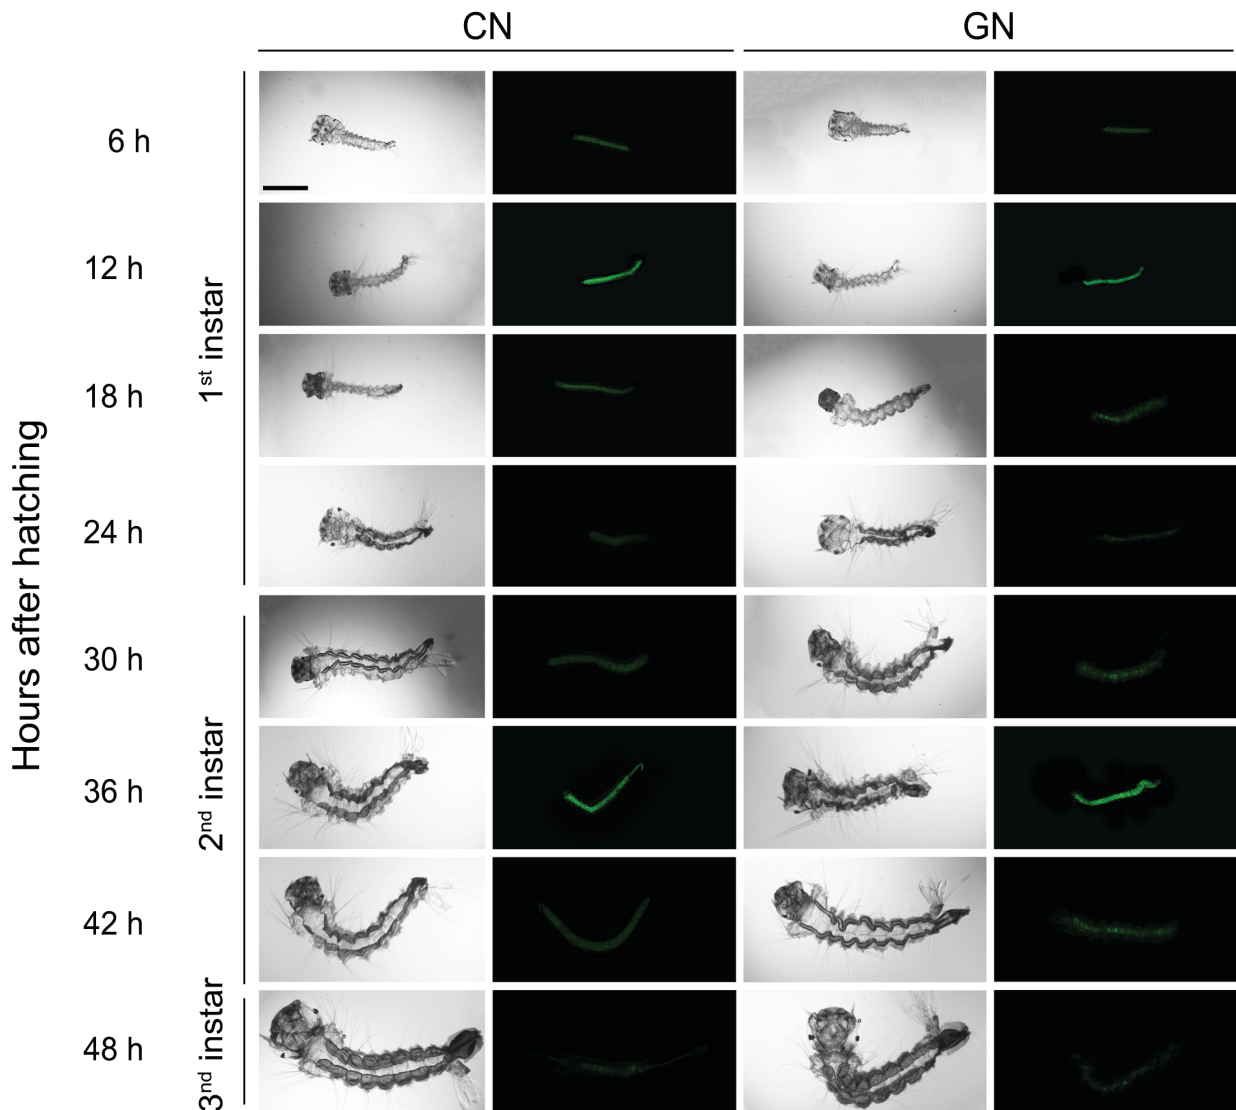

**Fig. S2.** Image iT fluorescence in conventional (CN) and gnotobiotic larvae inoculated by wild-type *E. coli* (GN). Individual larvae were examined by confocal microscopy from 6-48 h post-hatching. Sampling times are indicated to the left. For each treatment, the image to the left shows a light image of a larva while the right shows the corresponding fluorescence image. Anterior (head) of each larva is oriented to the left. Image iT fluorescence (green) is restricted to the midgut and is most intense in pre-critical size larvae (see main text). Scale bar in the upper left equals 500  $\mu$ m. A total of 10 larvae was examined for each treatment and time point with all outcomes similar to the images shown.

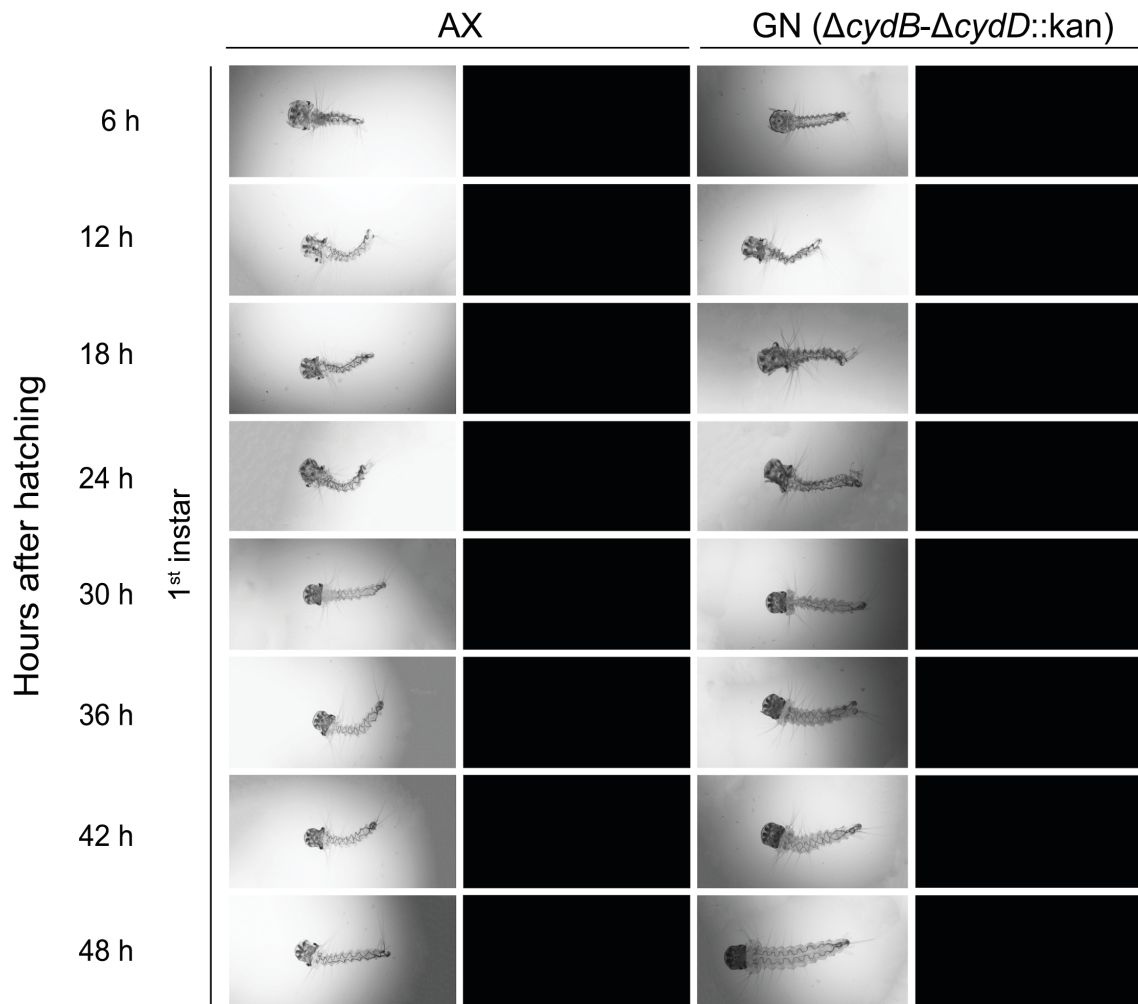

**Fig. S3.** Image iT fluorescence in axenic (AX) and gnotobiotic larvae inoculated with  $\Delta cydB$ - $\Delta cydD$ ::kan *E. coli* [GN ( $\Delta cydB$ - $\Delta cydD$ ::kan)]. Individual larvae were examined and are oriented as in Fig. S1. Note the absence of Image iT fluorescence in larvae for both treatments. A total of 10 larvae was examined for each treatment and time point with all outcomes similar to the images shown.

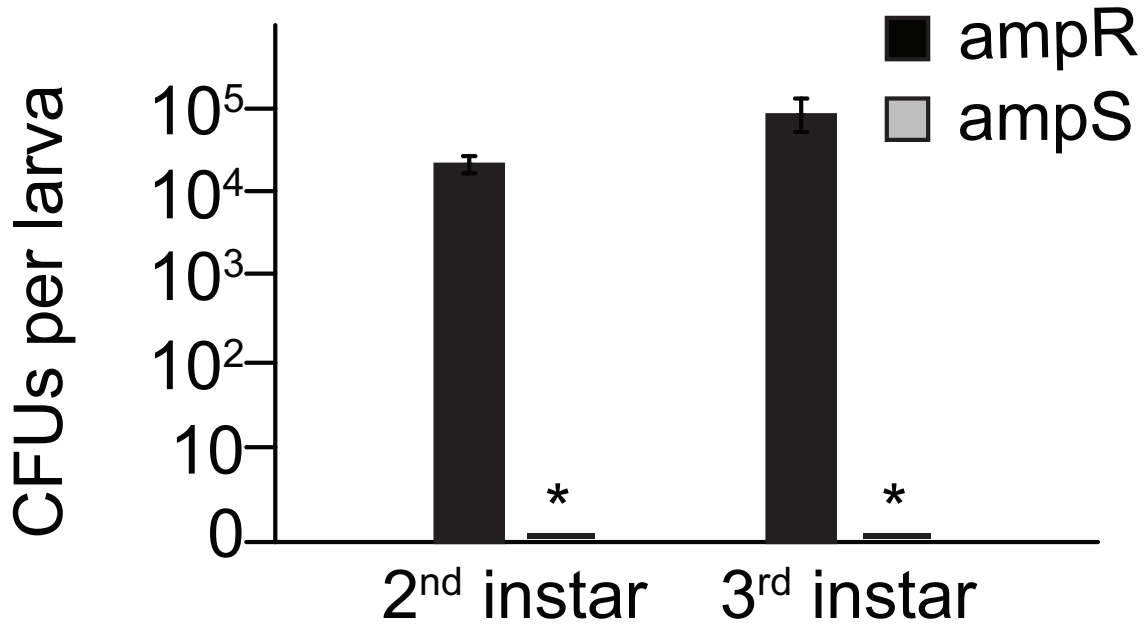

**Fig. S4.** Ampicillin treatment eliminated ampicillin-susceptible (ampS) *E. coli* from *Ae. aegypti* larvae while ampicillin-resistant (ampR) *E. coli* persisted. Gnotobiotic larvae inoculated with ampR and ampS *E. coli* were treated by adding ampicillin to cultures after larvae molted to the 2<sup>nd</sup> or 3<sup>rd</sup> instar. Individual larvae were subsequently homogenized 24 h post-treatment and the resulting homogenates cultured on LB plates at 37° for 24 h to determine cfu ± SE per larva. Four individual larvae were bioassayed per treatment.



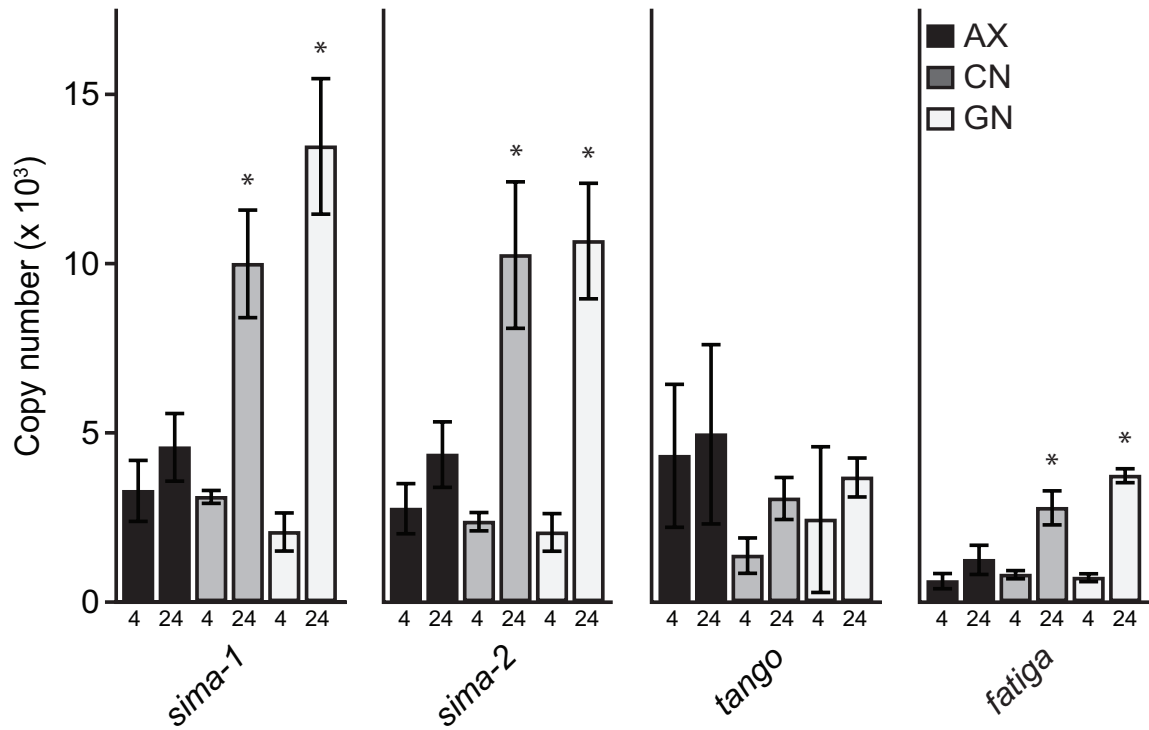

**Fig. S5.** Transcript copy number of *Ae. aegypti* hypoxia genes in axenic (AX), conventional (CN) and gnotobiotic first instars inoculated with wild-type *E. coli* (GN). Larvae were collected at 4 h and 24 h post-hatching followed by extraction of total RNA and RT-qPCR analysis (see Supplemental Experimental Procedures). The bars in each graph show copy number of each gene ( $\pm$  SE) per 500 ng of total RNA. For each gene, an asterisk (\*) indicates copy number significantly differed from all other treatments and sample times ( $P < 0.05$ , ANOVA followed by a post-hoc Tukey-Kramer Honest Significant Difference test). A minimum of 4 independent biological replicates were analyzed per treatment and time point.

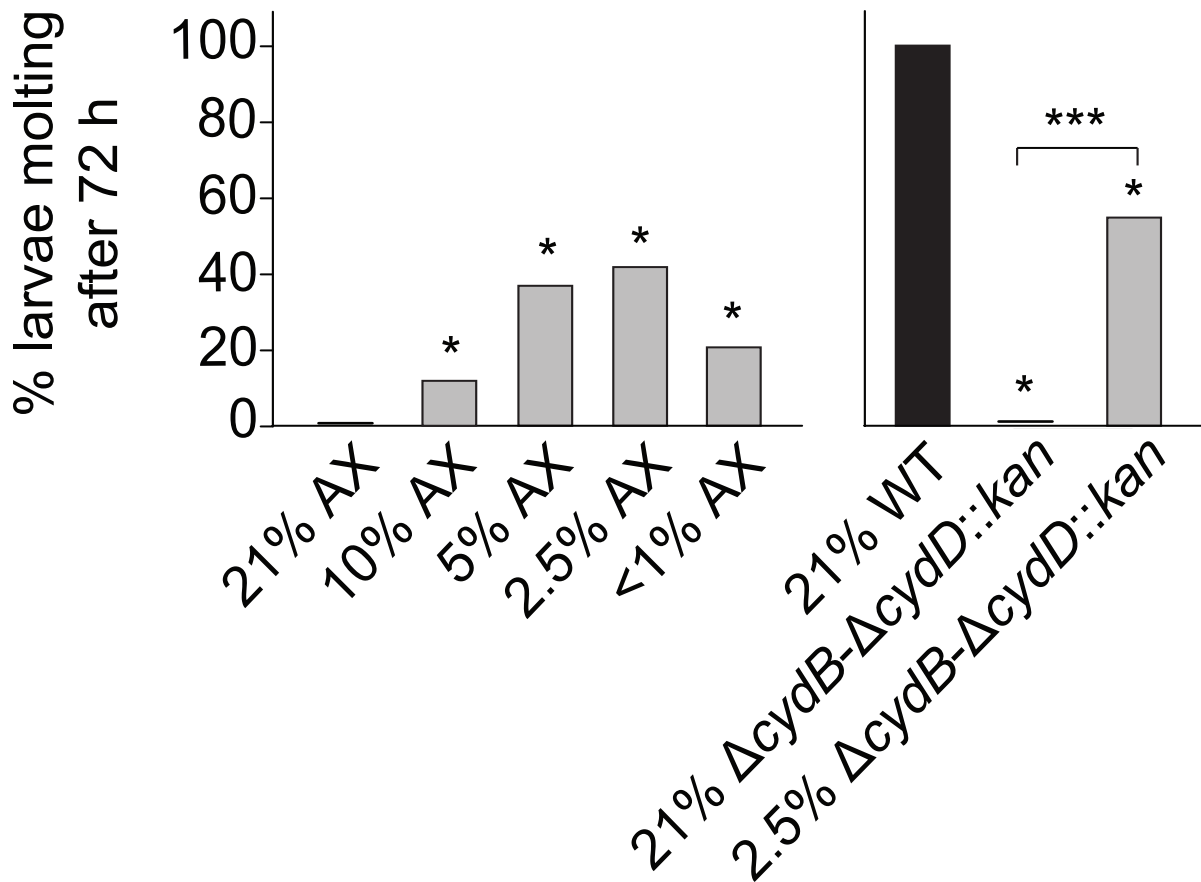

**Fig. S6.** Percentage of axenic (AX) or gnotobiotic larvae inoculated with  $\Delta cydB-\Delta cydD::kan$  *E. coli* that molted to the second instar after transient exposure to environmental hypoxia. In the left panel axenic larvae were maintained at 21% oxygen (normoxia) or exposed for 2 h to 10%–<1% oxygen. An asterisk (\*) indicates a significant difference in the proportion of larvae that initiated a molt relative to larvae maintained at 21% oxygen ( $P < 0.0001$ , Fisher's exact test). In the right panel larvae inoculated with wild-type (WT) *E. coli* were maintained at 21% oxygen while larvae inoculated with  $\Delta cydB-\Delta cydD::kan$  *E. coli* were either maintained in 21% oxygen or exposed for 2 h to 2.5% oxygen. \* indicates that  $\Delta cydB-\Delta cydD::kan$  larvae exposed to 21% and 2.5% oxygen differed from the WT positive control ( $P < 0.0001$ , Fisher's exact test). \*\*\* indicates that significantly more  $\Delta cydB-\Delta cydD::kan$  larvae exposed to 2.5% oxygen initiated a molt than  $\Delta cydB-\Delta cydD::kan$  larvae held in 21% oxygen. At least 40 larvae were assayed per treatment. Initiation of molting was based upon visually seeing the formation of new cuticle beneath the old cuticle of the larva.

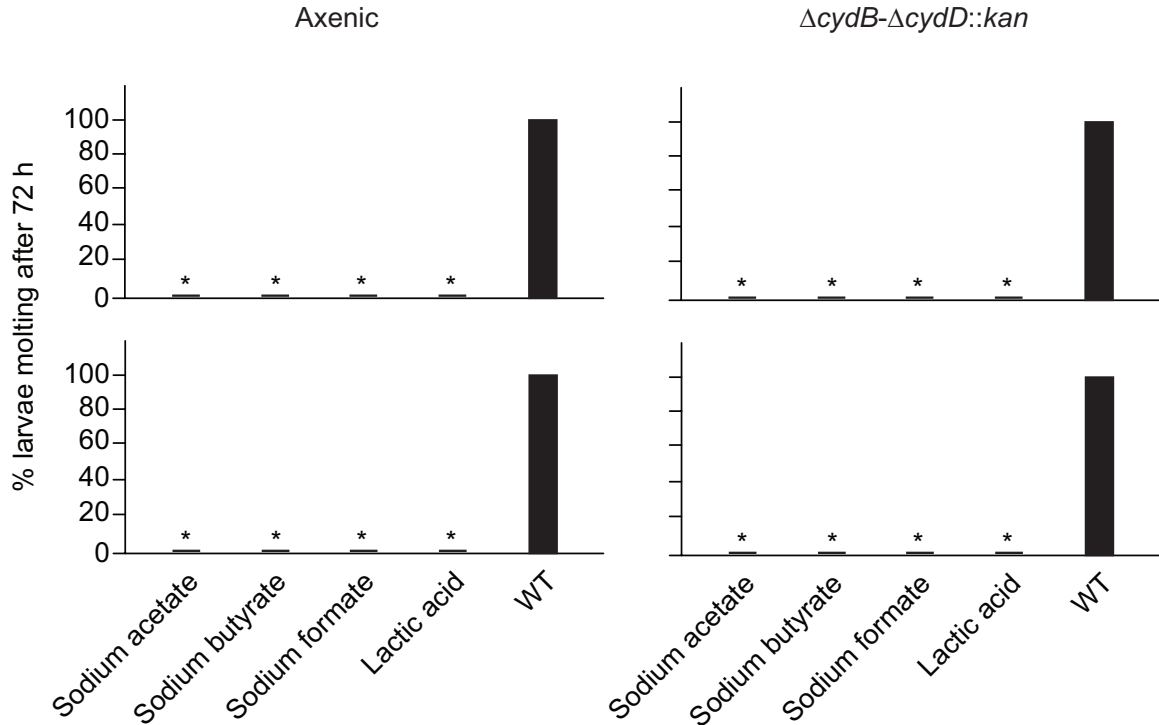

**Fig. S7.** Addition of sodium acetate, sodium butyrate, sodium formate or lactic acid to cultures does not induce axenic or gnotobiotic larvae inoculated with  $\Delta cydB-\Delta cydD::kan$  *E. coli* to molt. Newly hatched axenic larvae were individually placed into wells containing 1 ml of water and 100  $\mu\text{g}$  of standard rearing diet plus no bacteria (Axenic) (left panel) or  $1 \times 10^6$   $\Delta cydB-\Delta cydD::kan$  *E. coli* (right panel). Sodium acetate (Sigma), sodium butyrate (Sigma), sodium formate (Sigma), or 0.2-2% (v/v) lactic acid was then added to wells at a working concentration of either 10  $\mu\text{M}$  (upper panel) or 1 mM (lower panel). A minimum of 20 larvae per treatment was monitored for 72 h and the proportion of larvae that molted to the second instar was recorded. Individual larvae placed in wells containing 1 ml of water and 100  $\mu\text{g}$  of standard rearing diet plus  $1 \times 10^6$  wild-type (WT) *E. coli* served as a positive control.

## Supplemental Experimental Procedures

**Measurement of 20E Titters by EIA.** Thirty staged first instars per sample were homogenized in 400  $\mu$ l of 5% aqueous methanol and centrifuged. Each supernatant was added to a C<sub>18</sub> solid phase extraction column (Phenomenex), while the pellet was washed with 500  $\mu$ l of 5% aqueous methanol, re-centrifuged, and added to the same C<sub>18</sub> column. After rinsing with one volume of 5% methanol, ecdysteroids were eluted with 1 ml of 100% methanol, evaporated to dryness, and stored at -80° C. Samples were rehydrated with cold phosphate-buffered saline and analyzed by enzyme immunoassay (EIA) (60) in 96-well plates (Costar). Plate wells were coated with an ecdysone-lactoglobulin conjugate. Sample medium (50  $\mu$ l) or 20E standards (4-2000 pg) were added to wells followed by affinity purified ecdysone antiserum (50  $\mu$ l, 1:2,500 final dilution). After washing, a horseradish peroxidase-conjugated goat anti-rabbit secondary antibody (Sigma) was added, followed by rinsing, and addition of substrate (3,30,5,5'-tetramethylbenzidine) (KPL). After stopping the reaction with an equal volume of 1 M phosphoric acid, absorbance was measured at 450 nm using a plate reader (Biotek) followed by determination of ecdysone concentration in each sample relative to the standard curve.

**RT-qPCR Analysis of *Ae. aegypti* Hypoxia Genes.** Total RNA was extracted from 10 larvae per treatment using the Qiagen RNEasy mini kit following the manufacturer's instructions. Following the extraction, RNA was subject to DNase treatment using the Turbo DNA-free kit (Life Technologies). cDNA was then synthesized using 500 ng of total RNA using the BioRad iScript cDNA synthesis kit. The following primers were used for qPCR:

AAEL001097-forward (*hif $\alpha$ /sima1*) GAAATGTTGCCAATGGTGAA  
AAEL001097-reverse (*hif $\alpha$ /sima1*) GGTAATATCCCCATCAGCAG  
AAEL015383-forward (*hif $\alpha$ /sima2*) GAAATGTTGCCAATGGTGAA  
AAEL015383-reverse (*hif $\alpha$ /sima2*) GAGAGTAGGGCTAGCTTTTC  
AAEL010343-forward (*hif $\beta$ /tango*) CAGATGTTTTCGGTGATGTAC  
AAEL010343-reverse (*hif $\beta$ /tango*) TACACACCACGTA CTCAATG  
AAEL002798-forward (*fatiga*) GGGAACAATAGTGGTTACAGT  
AAEL002798-reverse (*fatiga*) GAGTTAACTGCATTTACCTC  
AAEL000741-forward (*e74*) GAAGTCCCAGATTCCTACTAC  
AAEL000741-reverse (*e74*) TAGCGGATGTTCTTCTTTGAT

AAEL009496-forward (ribosomal protein S7) ACCGCCGTCTACGATGCCA  
AAEL009496-reverse (ribosomal protein S7) ATGGTGGTCTGCTGGTTCTT.

PCR products were amplified from cDNA and cloned into the vector pSC-A using the Strataclone kit (Agilent). Inserts were sequenced to verify product length and to determine copy number then serially diluted to produce standard curves for each gene using qPCR. Four biological replicates for each treatment and time point were run in four technical replicates on a Rotor Gene-Q (Qiagen) using RT<sup>2</sup> SYBR Green qPCR Mastermix (Qiagen) according to the manufacturer's instructions. Ribosomal protein S7 expression levels were used to normalize values between samples.

## References

1. Datsenko KA, Wanner BL (2000) One-step inactivation of chromosomal genes in *Escherichia coli* K-12 using PCR products. *Proc Natl Acad Sci USA* 97(12):6640-6645.
2. Baba T, Ara T, Hasegawa M, Takai Y, Okumura Y, Baba M, Datsenko KA, Tomita M, Wanner BL, Mori H (2006) Construction of *Escherichia coli* K-12 in-frame, single-gene knockout mutants: the Keio collection. *Mol Syst Biol* doi:10.1038/msb4100050.
3. Vogel KJ, Valzania L, Coon KL, Brown MR, Strand MR (2017) Transcriptome sequencing reveals large-scale changes in axenic *Aedes aegypti* larvae. *PLoS Negl Trop Dis* 11(1):e0005273.
